# Supplementary material for: Highly diversified Zika viruses imported to China, 2016
Source: PubMed Central journal article supplement (PMC4887330; doi:10.1007/s13238-016-0274-5), 2016-05-21
Supplement: 13238_2016_274_MOESM1_ESM.pdf [file 13238_2016_274_MOESM1_ESM.pdf]

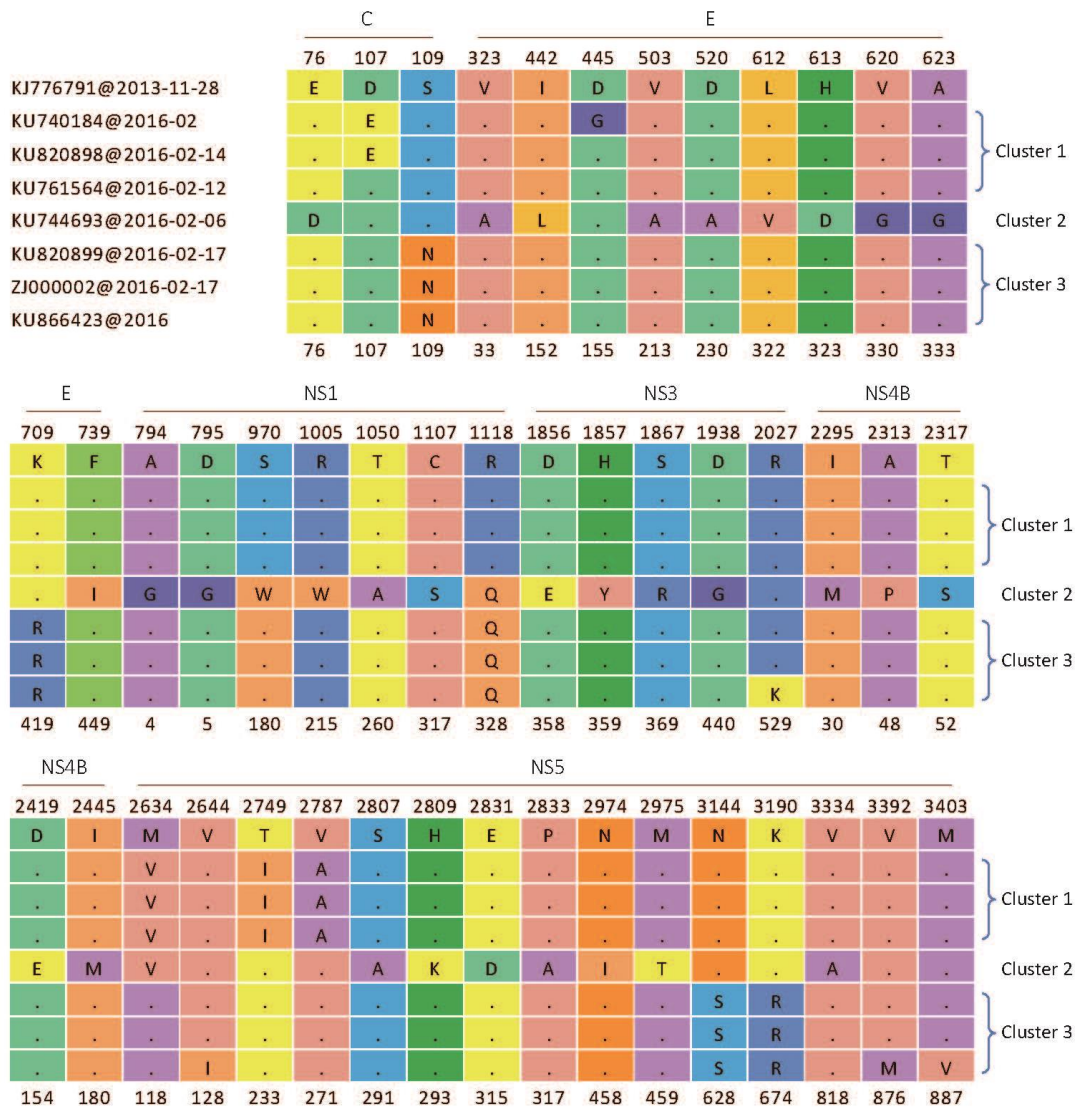

**Figure S1. Distinct amino acid polymorphisms of the three ZIKV clusters.** The numbers at the top indicate the positions with different amino acids in the ZIKV genomes, and the numbers at the bottom indicate the positions with different amino acids in each of the ZIKV encoded proteins.
